# Supplementary material for: Identification and immunoinfiltration analysis of key genes in ulcerative colitis using WGCNA
Source: PeerJ. 2024 Feb 26;12:e16921. doi: 10.7717/peerj.16921 (PMC10903335; doi:10.7717/peerj.16921)
Supplement: Supplemental Information 2 [file peerj-12-16921-s002.xls]

## Sheet: Sheet1
ITEM TO CHECK	IMPORTANCE	CHECKLIST
EXPERIMENTAL DESIGN
Definition of experimental and control groups	E	NC group, 5%-DSS group and 7%-DSS group. 118
Number within each group	E	n=10; 118
Assay carried out by core lab or investigator's lab?	D
Acknowledgement of authors' contributions	D
SAMPLE
Description	E	The mice in the modeling group were given autoclaved water containing 5% or 7% DSS, while those in the control group were only provided with autoclaved water, which was changed every other day. 119-121
Volume/mass of sample processed	D
Microdissection or macrodissection	E	macrodissection
Processing procedure	E	Daily observations were made to record the body weight, stool consistency and color, as well as presence of rectal bleeding of mice for the calculation of disease activity index (DAI). On the 7th day, the mice were euthanized via cervical dislocation, and their colon tissues were collected. 121-124
If frozen - how and how quickly?	E	The remaining colon tissues were rapidly snap-frozen in liquid nitrogen and stored at -80℃for subsequent RNA extraction. 126-128
If fixed - with what, how quickly?	E	no
Sample storage conditions and duration (especially for FFPE samples)	E	The remaining colon tissues were rapidly snap-frozen in liquid nitrogen and stored at -80℃for subsequent RNA extraction. 126-128
NUCLEIC ACID EXTRACTION
Procedure and/or instrumentation	E	Bio-Rad PCR detector
Name of kit and details of any modifications	E	138-141
Source of additional reagents used	D
Details of DNase or RNAse treatment	E	No DNAse treatment was applied.
Contamination assessment (DNA or RNA)	E	For each sample, no-reverse transcription controls were tested by qPCR using primers for β-actin reference gene. No amplification was detected ensuring the absence of significant genomic DNA contamination.
Nucleic acid quantification	E	yes
Instrument and method	E	137-142
Purity (A260/A280)	D
Yield	D
RNA integrity method/instrument	E	specific experimental procedures can be found in the kit manual
RIN/RQI or Cq of 3' and 5' transcripts	E	Not applied
Electrophoresis traces	D
Inhibition testing (Cq dilutions, spike or other)	E	Cq dilution was applied
REVERSE TRANSCRIPTION
Complete reaction conditions	E	Refer to kit instructions
Amount of RNA and reaction volume	E	100 ng of RNA; 10μLof reaction volume
Priming oligonucleotide (if using GSP) and concentration	E	Oligo dT Primer（50 μM）
Reverse transcriptase and concentration	E	Evo M-MLV RT Premix for qPCR kit
Temperature and time	E	Refer to kit instructions
Manufacturer of reagents and catalogue numbers	D
Cqs with and without RT	D*
Storage conditions of cDNA	D
qPCR TARGET INFORMATION
If multiplex, efficiency and LOD of each assay.	E	Four techniques were repeated for each sample, andthree data with similar repeatability were selected for analysis
Sequence accession number	E	Table 1
Location of amplicon	D
Amplicon length	E	Not marked, corresponding author can be contacted if necessary
In silico specificity screen (BLAST, etc)	E	The BLAST program were used.
Pseudogenes, retropseudogenes or other homologs?	D
Sequence alignment	D
Secondary structure analysis of amplicon	D
Location of each primer by exon or intron (if applicable)	E	The location of exon boundaries within transcript sequences was not found for the rabbit.
What splice variants are targeted?	E	Assays were not designed to detect splice variants.
qPCR OLIGONUCLEOTIDES
Primer sequences	E	Table 1
RTPrimerDB Identification Number	D
Probe sequences	D**
Location and identity of any modifications	E	no
Manufacturer of oligonucleotides	D
Purification method	D
qPCR PROTOCOL
Complete reaction conditions	E	Refer to kit instructions
Reaction volume and amount of cDNA/DNA	E	10μL reaction volume; 1μL of cDNA
Primer, (probe), Mg++ and dNTP concentrations	E	SYBR Green qPCR Mix (2X); PCR Forward Primer (10 μM); PCR Reverse Primer (10 μM)
Polymerase identity and concentration	E	SYBR Green qPCR Mix (2X)
Buffer/kit identity and manufacturer	E	Evo M-MLV RT Premix for qPCR kit ( Ecore Bio). HieffqPCR SYBRGreen Master Mix (No Rox) kit (Yisheng Biology). 138-141
Exact chemical constitution of the buffer	D
Additives (SYBR Green I, DMSO, etc.)	E	SYBR Green
Manufacturer of plates/tubes and catalog number	D
Complete thermocycling parameters	E	Refer to kit instructions
Reaction setup (manual/robotic)	D
Manufacturer of qPCR instrument	E	CFX Opus, BIO-RAD
qPCR VALIDATION
Evidence of optimisation (from gradients)	D
Specificity (gel, sequence, melt, or digest)	E	gel and sequence
For SYBR Green I, Cq of the NTC	E	NTC were not amplified or with Cq > 35
Standard curves with slope and y-intercept	E	Standard curves were determined with 7 points, 2-fold dilution series run in triplicate. Mean slope was -3.3044. Mean Y-intercept was 27.41.
PCR efficiency calculated from slope	E	1.007
Confidence interval for PCR efficiency or standard error	D
r2 of standard curve	E	Not mentioned in the article, corresponding author can be contacted if necessary
Linear dynamic range	E	The dynamic range covered 3 log10 concentrations.
Cq variation at lower limit	E	Not determined
Confidence intervals throughout range	D
Evidence for limit of detection	E	The lowest limit detection was not reached as the relationship was still linear at the lowest concentration used of 0.2 ng/µl; Cq were < 40 for all reactions.
If multiplex, efficiency and LOD of each assay.	E	Not applicable.
DATA ANALYSIS
qPCR analysis program (source, version)	E	iCycler software from Bio-Rad.
Cq method determination	E	The Icycler software established automatically a horizontal threshold through the exponential phase of the amplification plot where amplified cDNA just became detectable above the background fluorescence. The fractional cycle at which this horizontal thresholdcrossed the exponential phase determined the Cq.
Outlier identification and disposition	E	Each group was set up with 4 technique repeats, and the 3 most similar data were selected for analysis, all Cq were under the predefined cycle cut-off of 35.
Results of NTCs	E	NTCs were negative or > 36.
Justification of number and choice of reference genes	E	β-actin was selected as the internal reference gene
Description of normalisation method	E	Gene expression of an unknown sample was obtained relative to the sample with the lowest Cq value (DeltaCq) according to the Pfaffl's efficiency corrected model. Normalization of linear values was done by dividing by the geometric mean of the linear values of the optimal reference genes β-actin .
Number and concordance of biological replicates	D
Number and stage (RT or qPCR) of technical replicates	E	For the Genorm analysis, which included five candidate internal reference genes, qPCR was repeated in the same run for all samples included in the study. For target gene analysis (and normalization), four technique replicates were performed for each sample.
Repeatability (intra-assay variation)	E	∆Cq < 0.5 for all replicates. Intra-assay variation was expressed as standard deviation (SD) of the Cq variance.
Reproducibility (inter-assay variation, %CV)	D
Power analysis	D
Statistical methods for result significance	E	One-way ANOVA for comparisons between groups. Unpaired Student's t-test for compariosn between two groups.
Software (source, version)	E	GraphPad 8.0
Cq or raw data submission using RDML	D
Table 1. MIQE checklist for authors, reviewers and editors. All essential information (E) must be submitted with the manuscript. Desirable
information (D) should be submitted if available. If using primers obtained from RTPrimerDB, information on qPCR target, oligonucleotides,
protocols and validation is available from that source.
*: Assessing the absence of DNA using a no RT assay is essential when first extracting RNA. Once the sample has been validated as
RDNA-free, inclusion of a no-RT control is desirable, but no longer essential.
**: Disclosure of the probe sequence is highly desirable and strongly encouraged. However, since not all commercial pre-designed assay
vendors provide this information, it cannot be an essential requirement. Use of such assays is advised against.
